# Supplementary material
Source: MDPI journal article supplement (https://www.mdpi.com/2073-4441/10/11/1515)
Supplement: s1 [file s1]

**On-line Supplementary Tables**

**Table S1.** The physical parameters measured for the natural water samples in the study area.

| **Sample ID** | **Water type** | **Latitude (N, degree)** | **Longitude (E, degree)** | **Elevation (m a.s.l)** | **Depth (m)** | **Temperature (°C)** | **pH** | **Eh (mV)** | **EC (μS/cm)** | **TDS (mg/L)** | **Salinity (%)** | **Alkalinity (meq/L)** | **Hardness (°dH)** |
| --- | --- | --- | --- | --- | --- | --- | --- | --- | --- | --- | --- | --- | --- |
| g1 | Groundwater | 42.736306 | 116.747333 | 1396 | 12 | 5.8 | 6.72 | 3 | 769 | 410 | 0.6 | 5.47 | 9.42 |
| g2 | Groundwater | 42.736306 | 116.747333 | 1396 | 26 | 6.0 | 6.91 | -10 | 736 | 393 | 0.5 | 4.07 | 11.96 |
| g3 | Groundwater | 42.760194 | 116.760139 | 1355 | 32 | 7.7 | 6.88 | -6 | 725 | 384 | 0.5 | 2.39 | 11.94 |
| g4 | Groundwater | 42.759694 | 116.760417 | 1360 | 7 | 10.0 | 6.74 | 1 | 725 | 387 | 0.5 | 2.20 | 12.28 |
| g5 | Groundwater | 42.759556 | 116.760556 | 1362 | 27 | 7.6 | 6.46 | 16 | 691 | 368 | 0.5 | 2.23 | 15.57 |
| g6 | Groundwater | 42.760111 | 116.760250 | 1365 | 7 | 10.3 | 6.26 | 22 | 1240 | 660 | 0.8 | 3.25 | 24.45 |
| g7 | Groundwater | 42.806361 | 116.747806 | 1352 | 20 | 6.8 | 6.71 | 2 | 297 | 158 | 0.2 | 0.63 | 4.70 |
| g8 | Groundwater | 42.806361 | 116.747806 | 1352 | 16 | 6.5 | 6.92 | -8 | 276 | 147 | 0.2 | 0.58 | 5.00 |
| g9 | Groundwater | 42.850333 | 116.735722 | 1347 | 30 | 7.2 | 6.74 | -1 | 487 | 260 | 0.4 | 3.73 | 12.68 |
| g10 | Groundwater | 42.949861 | 116.759194 | 1321 | 37 | 9.9 | 6.75 | -2 | 337 | 179 | 0.2 | 1.66 | 7.23 |
| g11 | Groundwater | 42.967111 | 116.827528 | 1317 | 60 | 8.6 | 6.99 | -14 | 571 | 302 | 0.4 | 2.40 | 12.94 |
| l1 | Lake water | 42.424611 | 116.769194 | 1368 |  | 16.9 | 9.44 | -151 | 126 | 67 | 0.1 | 0.95 | 1.79 |
| l2 | Lake water | 42.424611 | 116.769194 | 1368 |  | 19.6 | 9.18 | -137 | 132 | 70 | 0.1 | 0.92 | 1.82 |
| l3 | Lake water | 42.424611 | 116.757806 | 1365 |  | 20.2 | 7.38 | -36 | 196 | 105 | 0.1 | 1.53 | 3.36 |
| l4 | Lake water | 42.427083 | 116.757639 | 1366 |  | 20.5 | 7.87 | -64 | 448 | 238 | 0.2 | 3.42 | 6.61 |
| l5 | Lake water | 42.421806 | 116.756917 | 1360 |  | 20.1 | 8.23 | -83 | 173 | 92 | 0.1 | 1.43 | 2.73 |
| l6 | Lake water | 42.736389 | 116.747222 | 1374 |  | 10.7 | 8.35 | -89 | 194 | 103 | 0.1 | 1.53 | 3.30 |
| r1 | River water | 42.530917 | 116.641250 | 1355 |  | 20.6 | 7.31 | -33 | 180 | 96 | 0.1 | 0.88 | 2.23 |
| r2 | River water | 42.310883 | 116.494817 | 1231 |  | 14.9 | 7.67 | -52 | 178 | 95 | 0.1 | 1.21 | 2.50 |
| r3 | River water | 42.385778 | 116.886194 | 1362 |  | 9.5 | 7.62 | -48 | 177 | 94 | 0.1 | 1.45 | 2.62 |
| r4 | River water | 42.931417 | 117.585306 | 1217 |  | 10.5 | 7.97 | -69 | 474 | 252 | 0.3 | 3.22 | 8.73 |
| r5 | Lake water | 43.079083 | 117.457389 | 1006 |  | 12.9 | 7.87 | -62 | 191 | 101 | 0.1 | 1.37 | 2.88 |
| s1 | Spring water | 42.530917 | 116.641250 | 1359 |  | 20.9 | 6.63 | 5 | 165 | 88 | 0.1 | 0.40 | 1.81 |
| s2 | Spring water | 42.965417 | 116.975361 | 1184 |  | 19.0 | 7.47 | -46 | 371 | 195 | 0.2 | 1.07 | 6.40 |
| p1 | Precipitation | 42.330750 | 116.551694 | 1260 |  | 20.2 | 4.61 | 109 | 78 | 42 | 0.0 | / | 0.61 |

**Table S2.** The concentrations of major cations and anions measured for the water samples in the study area.

| **Sample ID** | **F-**  **(mg/L)** | **Cl-**  **(mg/L)** | **NO2-**  **(mg/L)** | **NO3-**  **(mg/L)** | **SO42-**  **(mg/L)** | **CO32-**  **(mg/L)** | **HCO3-**  **(mg/L)** | **Li+**  **(mg/L)** | **Na+**  **(mg/L)** | **NH4+**  **(mg/L)** | **K+**  **(mg/L)** | **Mg2+**  **(mg/L)** | **Ca2+**  **(mg/L)** |
| --- | --- | --- | --- | --- | --- | --- | --- | --- | --- | --- | --- | --- | --- |
| g1 | 0.13 | 7.90 | 2.32 | 0.48 | 16.10 | 0.00 | 334.60 | 0.02 | 13.79 | 10.54 | 4.59 | 15.52 | 41.81 |
| g2 | 0.21 | 10.21 | 0.00 | 6.15 | 70.61 | 0.10 | 247.70 | 0.02 | 13.36 | 6.56 | 3.45 | 17.91 | 56.04 |
| g3 | 0.11 | 79.56 | 0.00 | 0.00 | 140.76 | 0.00 | 145.40 | 0.01 | 17.92 | 2.28 | 1.76 | 17.06 | 57.29 |
| g4 | 0.10 | 86.90 | 0.00 | 5.73 | 164.80 | 0.00 | 133.70 | 0.02 | 18.02 | 0.00 | 2.02 | 18.50 | 57.32 |
| g5 | 0.07 | 84.82 | 0.00 | 0.76 | 169.30 | 0.00 | 136.20 | 0.00 | 39.68 | 1.02 | 2.72 | 20.94 | 76.86 |
| g6 | 0.07 | 140.54 | 0.00 | 110.77 | 228.80 | 0.00 | 198.20 | 0.00 | 79.80 | 0.00 | 29.47 | 29.25 | 126.68 |
| g7 | 0.37 | 16.31 | 0.00 | 306.31 | 32.01 | 0.00 | 38.70 | 0.06 | 7.83 | 0.00 | 3.09 | 6.21 | 23.37 |
| g8 | 0.29 | 14.28 | 0.00 | 35.49 | 29.89 | 0.00 | 35.50 | 0.02 | 16.21 | 0.11 | 3.38 | 6.44 | 25.14 |
| g9 | 0.10 | 3.66 | 0.15 | 1.19 | 71.56 | 0.00 | 227.40 | 0.06 | 12.92 | 0.55 | 4.50 | 14.06 | 67.52 |
| g10 | 0.24 | 18.80 | 0.00 | 49.49 | 9.97 | 0.00 | 101.10 | 0.00 | 18.54 | 0.00 | 2.09 | 7.92 | 38.68 |
| g11 | 0.28 | 4.94 | 0.00 | 0.00 | 181.53 | 0.00 | 146.20 | 0.05 | 20.40 | 2.59 | 2.06 | 13.30 | 70.59 |
| l1 | 0.16 | 3.15 | 0.00 | 0.07 | 4.32 | 0.00 | 57.90 | 0.01 | 5.42 | 0.00 | 0.86 | 3.24 | 7.49 |
| l2 | 0.16 | 3.30 | 0.00 | 1.66 | 4.57 | 0.00 | 55.80 | 0.00 | 5.33 | 0.00 | 0.84 | 3.29 | 7.61 |
| l3 | 0.11 | 3.27 | 0.00 | 0.61 | 2.33 | 0.00 | 93.30 | 0.01 | 5.88 | 0.00 | 1.19 | 5.68 | 14.66 |
| l4 | 0.17 | 22.12 | 0.00 | 0.39 | 3.04 | 0.10 | 207.60 | 0.00 | 9.21 | 0.70 | 24.21 | 14.02 | 24.18 |
| l5 | 0.09 | 6.24 | 0.00 | 0.65 | 2.97 | 0.10 | 86.80 | 0.01 | 6.72 | 0.00 | 1.16 | 4.91 | 11.41 |
| l6 | 0.18 | 4.29 | 0.00 | 0.80 | 9.34 | 0.10 | 93.00 | 0.01 | 8.41 | 0.00 | 1.36 | 6.47 | 12.95 |
| r1 | 0.30 | 5.76 | 0.00 | 2.38 | 26.67 | 0.30 | 52.40 | 0.01 | 7.15 | 0.00 | 2.99 | 3.41 | 10.34 |
| r2 | 0.19 | 4.82 | 0.00 | 0.65 | 16.40 | 0.10 | 73.10 | 0.01 | 6.82 | 0.00 | 1.92 | 3.96 | 11.36 |
| r3 | 0.64 | 5.46 | 0.00 | 0.43 | 5.57 | 0.00 | 88.10 | 0.01 | 7.11 | 0.00 | 1.13 | 4.04 | 12.06 |
| r4 | 1.08 | 20.39 | 0.00 | 19.27 | 37.25 | 0.50 | 195.00 | 0.01 | 13.02 | 0.00 | 1.96 | 11.90 | 42.81 |
| r5 | 0.19 | 4.10 | 0.00 | 1.08 | 15.57 | 0.00 | 82.60 | 0.01 | 6.71 | 0.00 | 2.08 | 4.38 | 13.40 |
| s1 | 0.16 | 6.44 | 0.00 | 1.95 | 34.25 | 0.00 | 24.30 | 0.02 | 6.56 | 0.00 | 1.62 | 2.92 | 8.10 |
| s2 | 0.05 | 0.98 | 0.00 | 0.45 | 17.15 | 0.00 | 64.90 | 0.02 | 9.87 | 0.00 | 3.32 | 9.10 | 30.79 |
| p1 | 0.61 | 2.90 | 0.00 | 9.46 | 12.65 | 0.00 | 0.00 | 0.00 | 2.09 | 2.07 | 1.64 | 0.88 | 2.95 |
